# Supplementary material for: Synthetic protocols toward polypeptide conjugates via chain end functionalization after RAFT polymerization
Source: Royal Society of Chemistry journal article supplement (doi:10.1039/c4ra17094f), 2015-01-01
Supplement: c4ra17094f1.pdf [file c4ra17094f1.pdf]

## Electronic Supplementary Information

### Synthetic Protocols toward Polypeptide Conjugates *via* Chain End

#### Functionalization after RAFT Polymerization

Yifei Wang, Jun Ling\*

MOE Key Laboratory of Macromolecular Synthesis and Functionalization,  
Department of Polymer Science and Engineering, Zhejiang University, Hangzhou  
310027, China

\* Correspondence author, Email: lingjun@zju.edu.cn, Tel: +86-571-87953739

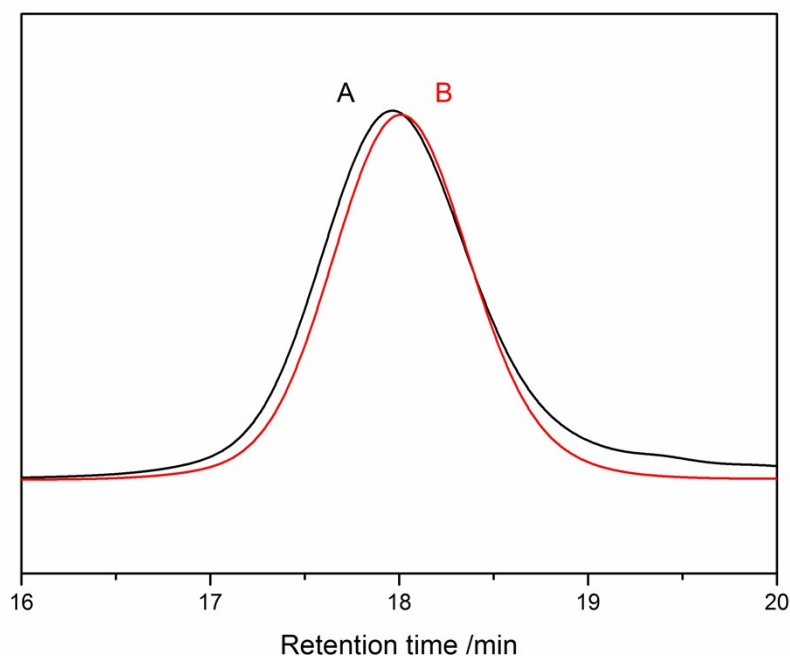

**Figure S1.** SEC traces of PS<sub>35</sub>-TTC (A) and PS<sub>35</sub>-NHBoc (B) in THF

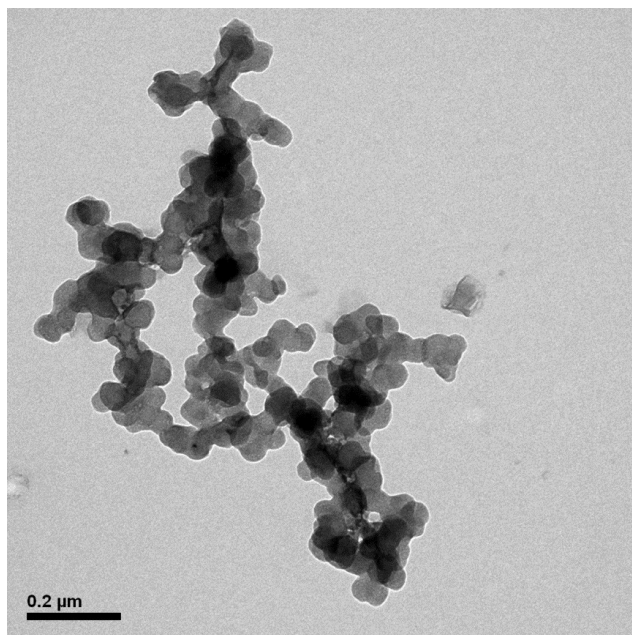

**Figure S2.** TEM image of PS-PGLu1 micelle prepared in aqueous solution at pH=5.5

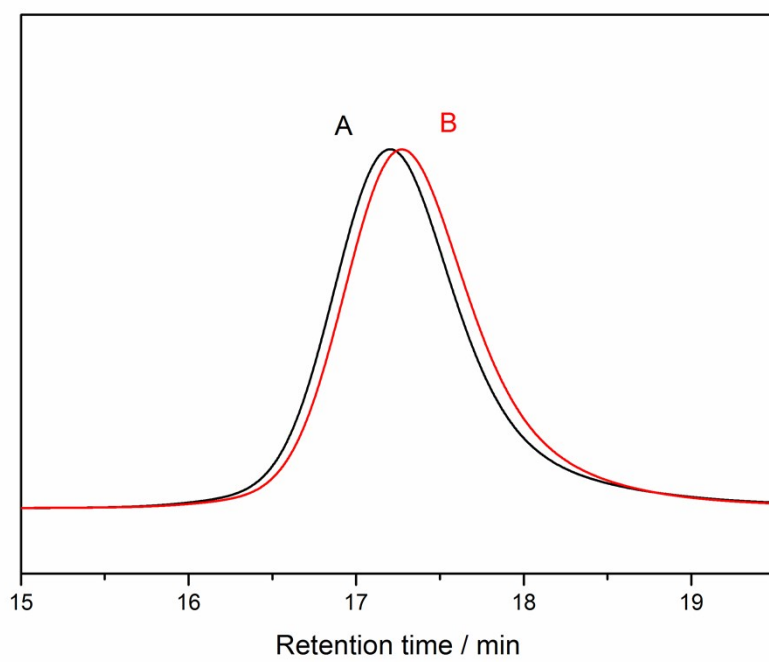

**Figure S3.** SEC traces of PS<sub>57</sub>-TTC (A) and PS<sub>57</sub>-SS-NHBoc (B) in THF

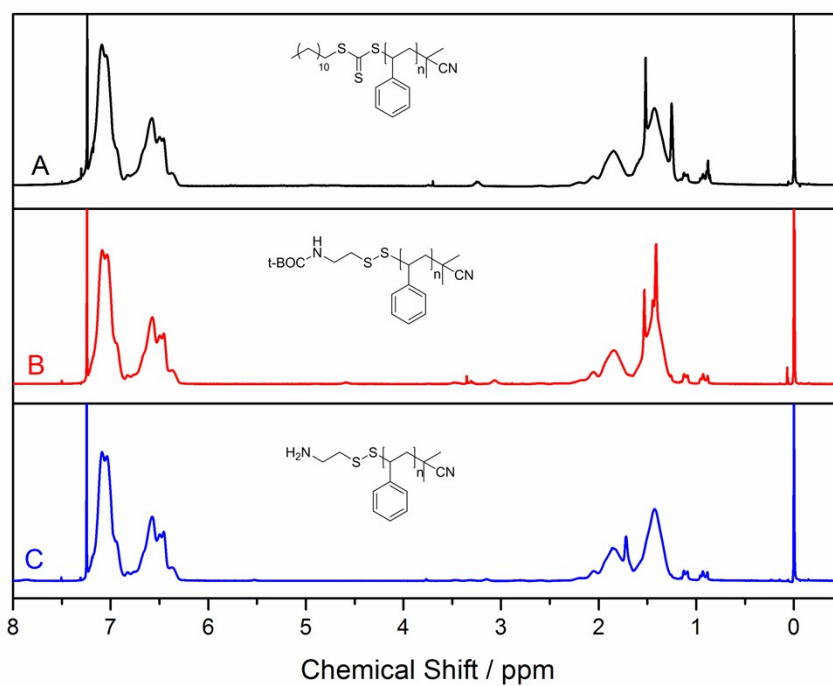

**Figure S4.**  $^1\text{H}$  NMR spectra of  $\text{PS}_{57}\text{-TTC}$  (A), and  $\text{PS}_{57}\text{-SS-NHBoc}$  (B) and  $\text{PS}_{57}\text{-SS-NH}_2$  (C) in  $\text{CDCl}_3$

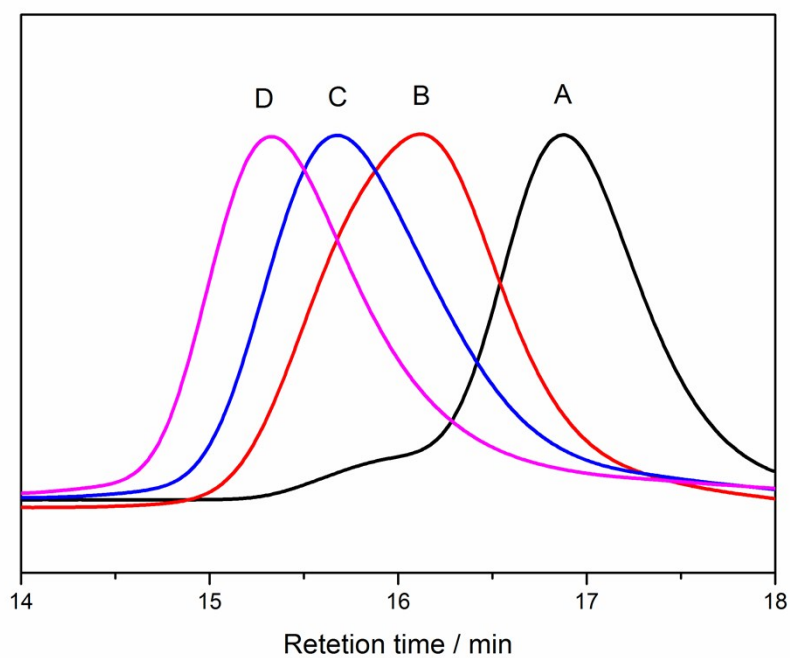

**Figure S5.** SEC traces of  $\text{PS}_{57}\text{-SS-NH}_2$  (A),  $\text{PS-PBLG4}$  (B),  $\text{PS-PBLG5}$  (C) and  $\text{PS-PBLG6}$  (D) in DMF

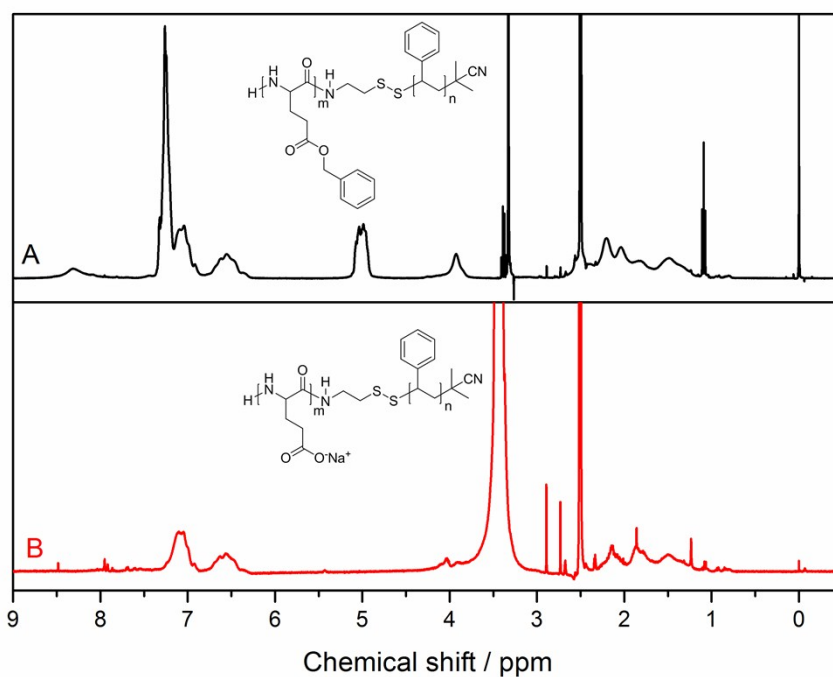

**Figure S6.**  $^1\text{H}$  NMR spectra of PS-PBLG5 (A) and PS-PGlu5 (B) in  $d\text{-DMSO}$

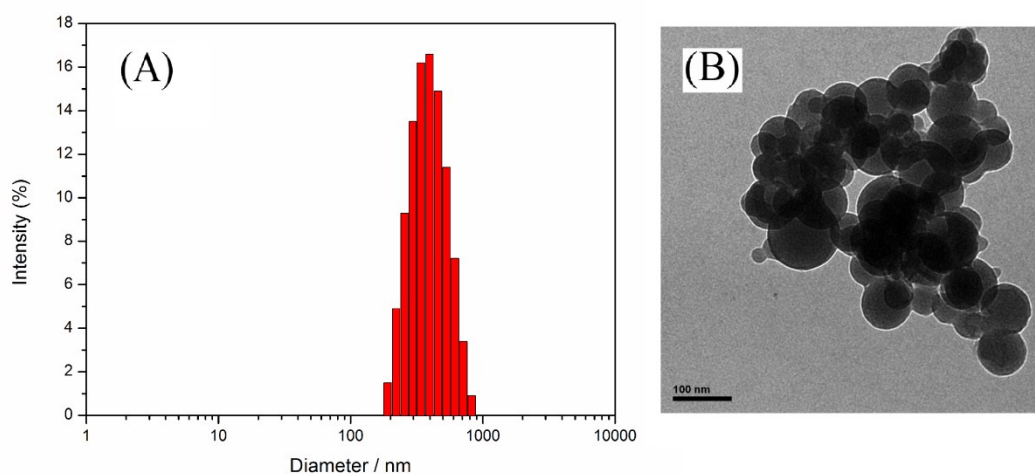

**Figure S7.** DLS size distribution (A) and TEM image (B) of PS-PGlu5 micelle in aqueous media at  $\text{pH}=5.5$
